# Supplementary material for: Molecular structure of titania-supported molybdena: in situ Raman and FTIR spectroscopy of distinct MoVIOx configurations dispersed on titania
Source: Royal Society of Chemistry journal article supplement (doi:10.1039/d6ra00034g), 2026-05-01
Supplement: d6ra00034g1.pdf [file d6ra00034g1.pdf]

# Molecular structure of titania – supported molybdena catalysts: *in situ* Raman and FTIR spectroscopy of distinct Mo<sup>VI</sup>O<sub>x</sub> configurations dispersed on titania

## SUPPLEMENTARY INFORMATION

Theocharis Kentri<sup>1,2</sup>, Paraskevas Dimitropoulos<sup>1</sup>, Konstantina Niavi<sup>1</sup>  
Eleana Kordouli<sup>3</sup> and Soghomon Boghosian<sup>\*,1,2,4</sup>

<sup>1</sup> Department of Chemical Engineering, University of Patras, Patras, Greece

<sup>2</sup> Institute of Chemical Engineering Sciences, FORTH/ICE-HT, Patras, Greece

<sup>3</sup> Department of Chemistry, University of Patras, Patras, Greece

<sup>4</sup> School of Science and Technology, Hellenic Open University, GR-26335 Patras, Greece

(\*) to whom correspondence should be addressed

e-mail: [bogosian@chemeng.upatras.gr](mailto:bogosian@chemeng.upatras.gr)

---

## CONTENTS

- **Figure S1.** Superposition of *in situ* Raman spectra obtained for bare TiO<sub>2</sub>(anatase) with the corresponding spectra obtained for 1.1 Mo/nm<sup>2</sup> MoO<sub>x</sub>/TiO<sub>2</sub>(anatase) under flowing 20% O<sub>2</sub>/He at (A) 175 °C; (B) 250 °C. Recording parameters: Laser wavelength,  $\lambda_0 = 491.7$  nm; laser power,  $w = 10$  mW; time constant,  $\tau = 0.3$  s; spectral slit width,  $sw = 7$  cm<sup>-1</sup>.
- **Figure S2.** Effect of coverage for MoO<sub>x</sub>/TiO<sub>2</sub>(anatase) catalysts, in the 0.55 – 4.9 Mo/nm<sup>2</sup> range under flowing 20% O<sub>2</sub>/He at 250 °C. (A) *in situ* Raman spectra. Recording parameters: see the caption to Fig. 2(A). (B) *in situ* FTIR spectra.
- **Figure S3.** Effect of coverage for MoO<sub>x</sub>/TiO<sub>2</sub>(P25) catalysts, in the 0.55 – 4.9 Mo/nm<sup>2</sup> range under flowing 20% O<sub>2</sub>/He at 250 °C. (A) *in situ* Raman spectra. Recording parameters: see the caption to Fig. 2(A). (B) *in situ* FTIR spectra.
- **Figure S4.** MoO<sub>x</sub>/TiO<sub>2</sub>(anatase) with surface density of 2.1 Mo/nm<sup>2</sup>. (A) See caption to Fig. 2(A). (B) See caption to Figure 2(C).
- **Figure S5.** MoO<sub>x</sub>/TiO<sub>2</sub>(P25) with surface density of 1.9 Mo/nm<sup>2</sup>. (A) See caption to Fig. 2(A). (B) See caption to Figure 2(C).
- **Figure S6.** MoO<sub>x</sub>/TiO<sub>2</sub>(anatase) with surface density of 2.7 Mo/nm<sup>2</sup>. (A) See caption to Fig. 2(A). (B) See caption to Figure 2(C).

- **Figure S7.** MoO<sub>x</sub>/TiO<sub>2</sub>(P25) with surface density of 2.9 Mo/nm<sup>2</sup>. (A) See caption to Fig. 2(A). (B) See caption to Figure 2(C).
- **Figure S8.** MoO<sub>x</sub>/TiO<sub>2</sub>(anatase) with surface density of 3.7 Mo/nm<sup>2</sup>. (A) See caption to Fig. 2(A). (B) See caption to Figure 2(C).
- **Figure S9.** MoO<sub>x</sub>/TiO<sub>2</sub>(P25) with surface density of 3.7 Mo/nm<sup>2</sup>. (A) See caption to Fig. 2(A). (B) See caption to Figure 2(C).
- **Figure S10.** MoO<sub>x</sub>/TiO<sub>2</sub>(anatase) with surface density of 4.9 Mo/nm<sup>2</sup>. (A) See caption to Fig. 2(A). (B) See caption to Figure 2(C).
- **Figure S11.** MoO<sub>x</sub>/TiO<sub>2</sub>(P25) with surface density of 4.3 Mo/nm<sup>2</sup>. (A) See caption to Fig. 2(A). (B) See caption to Figure 2(C).

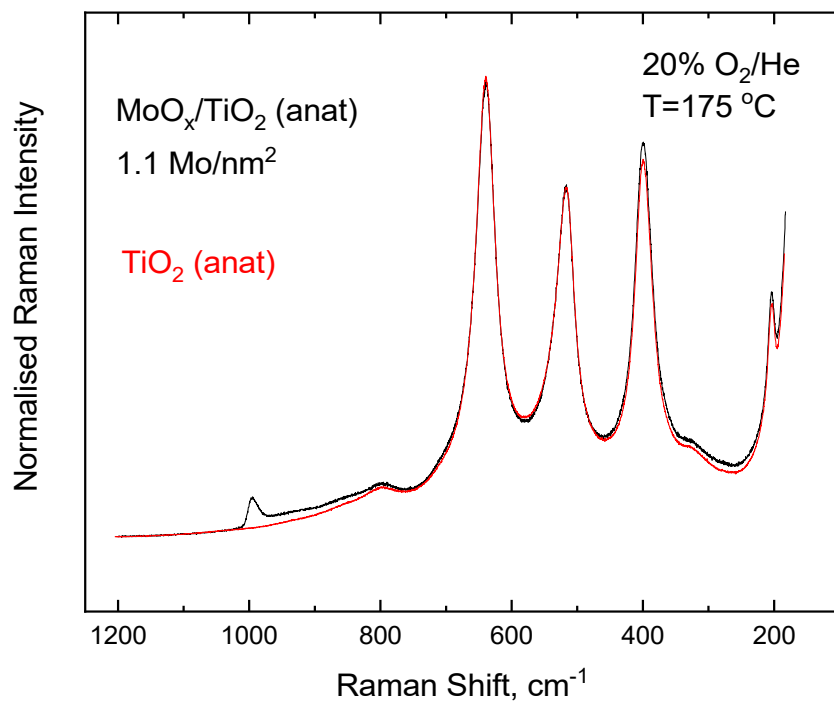

**A**

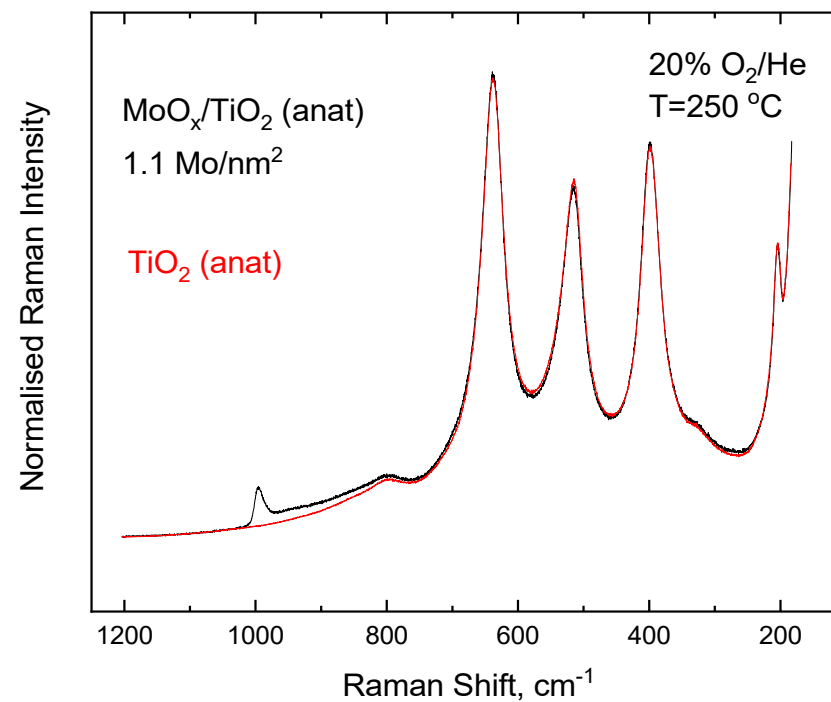

**B**

**Figure S1.** Superposition of *in situ* Raman spectra obtained for bare TiO<sub>2</sub>(anatase) with the corresponding spectra obtained for 1.1 Mo/nm<sup>2</sup> MoO<sub>x</sub>/TiO<sub>2</sub>(anatase) under flowing 20% O<sub>2</sub>/He at (A) 175 °C; (B) 250 °C. Recording parameters: Laser wavelength,  $\lambda_0 = 491.7$  nm; laser power,  $w = 10$  mW; time constant,  $\tau = 0.3$  s; spectral slit width,  $sw = 7$  cm<sup>-1</sup>.

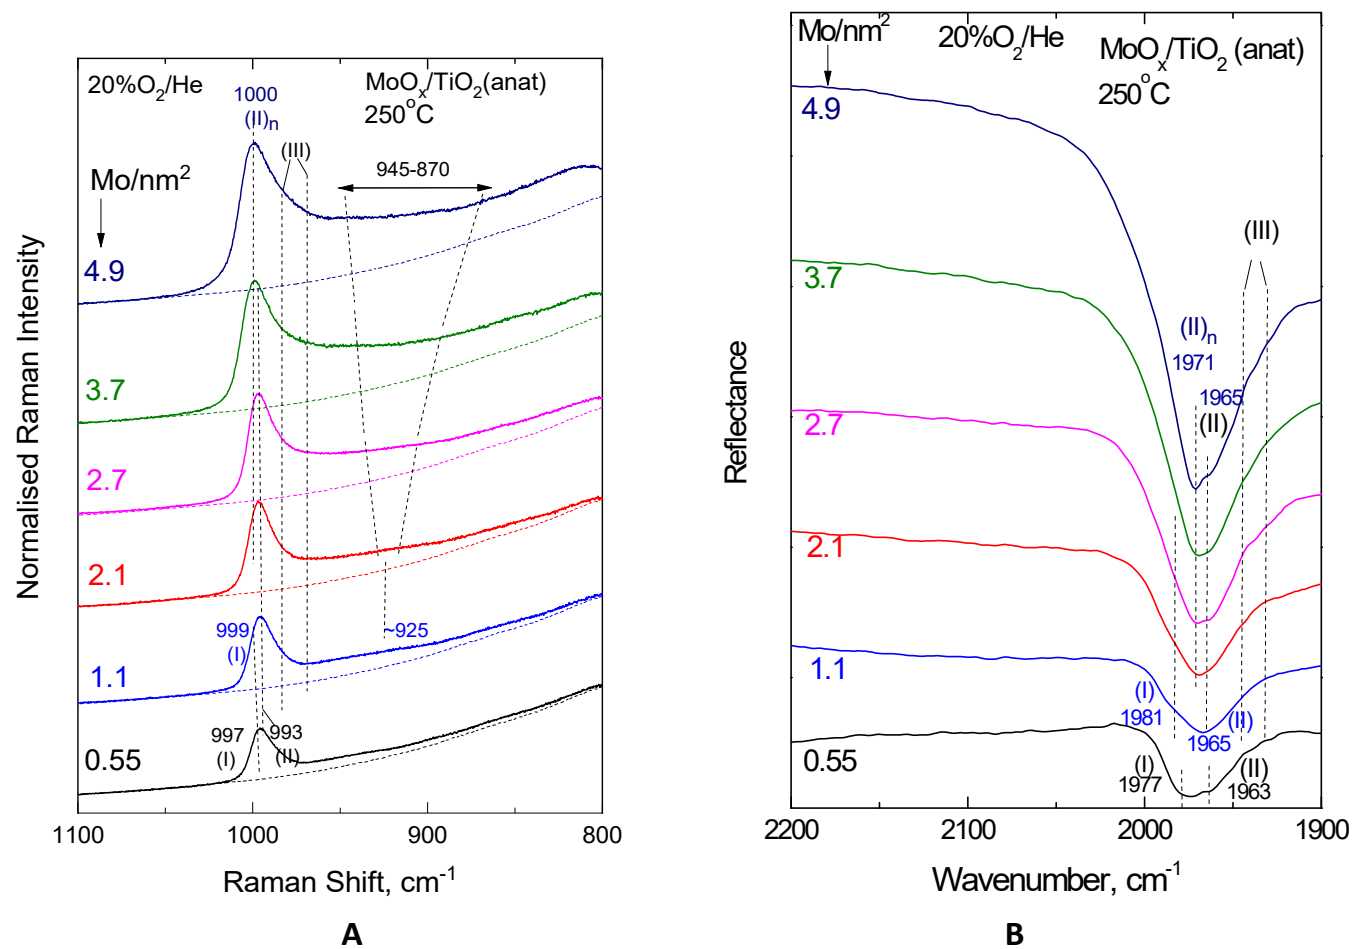

**Figure S2.** Effect of coverage for MoO<sub>x</sub>/TiO<sub>2</sub>(anatase) catalysts, in the 0.55 – 4.9 Mo/nm<sup>2</sup> range under flowing 20% O<sub>2</sub>/He at 250 °C. (A) *in situ* Raman spectra. Recording parameters: see the caption to Fig. 2(A). (B) *in situ* FTIR spectra.

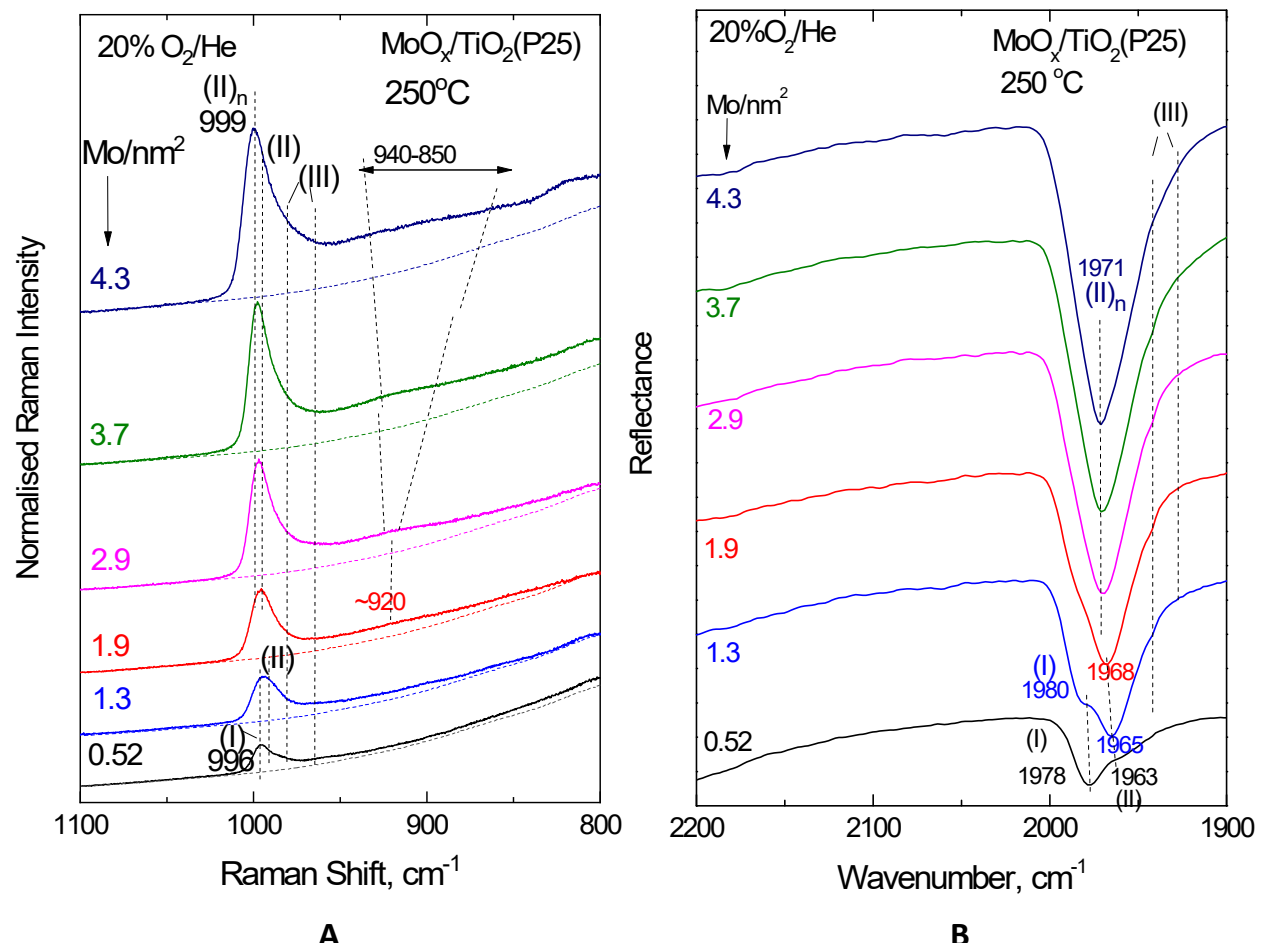

**Figure S3.** Effect of coverage for MoO<sub>x</sub>/TiO<sub>2</sub>(P25) catalysts, in the 0.55 – 4.9 Mo/nm<sup>2</sup> range under flowing 20% O<sub>2</sub>/He at 250 °C. (A) *in situ* Raman spectra. Recording parameters: see the caption to Fig. 2(A). (B) *in situ* FTIR spectra.

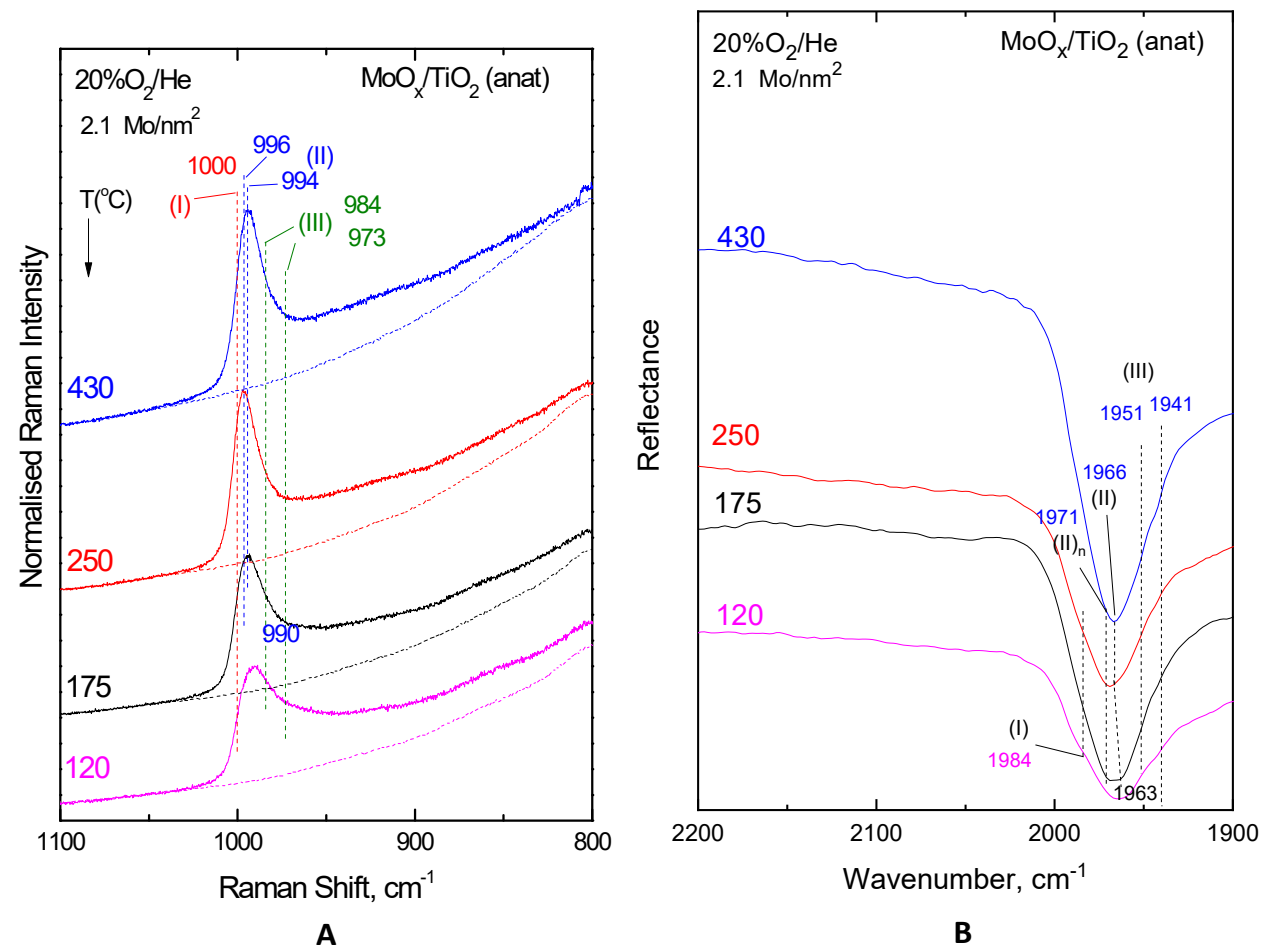

**Figure S4.**  $\text{MoO}_x/\text{TiO}_2$ (anatase) with surface density of  $2.1 \text{ Mo/nm}^2$ . (A) See caption to Fig. 2(A). (B) See caption to Figure 2(C).

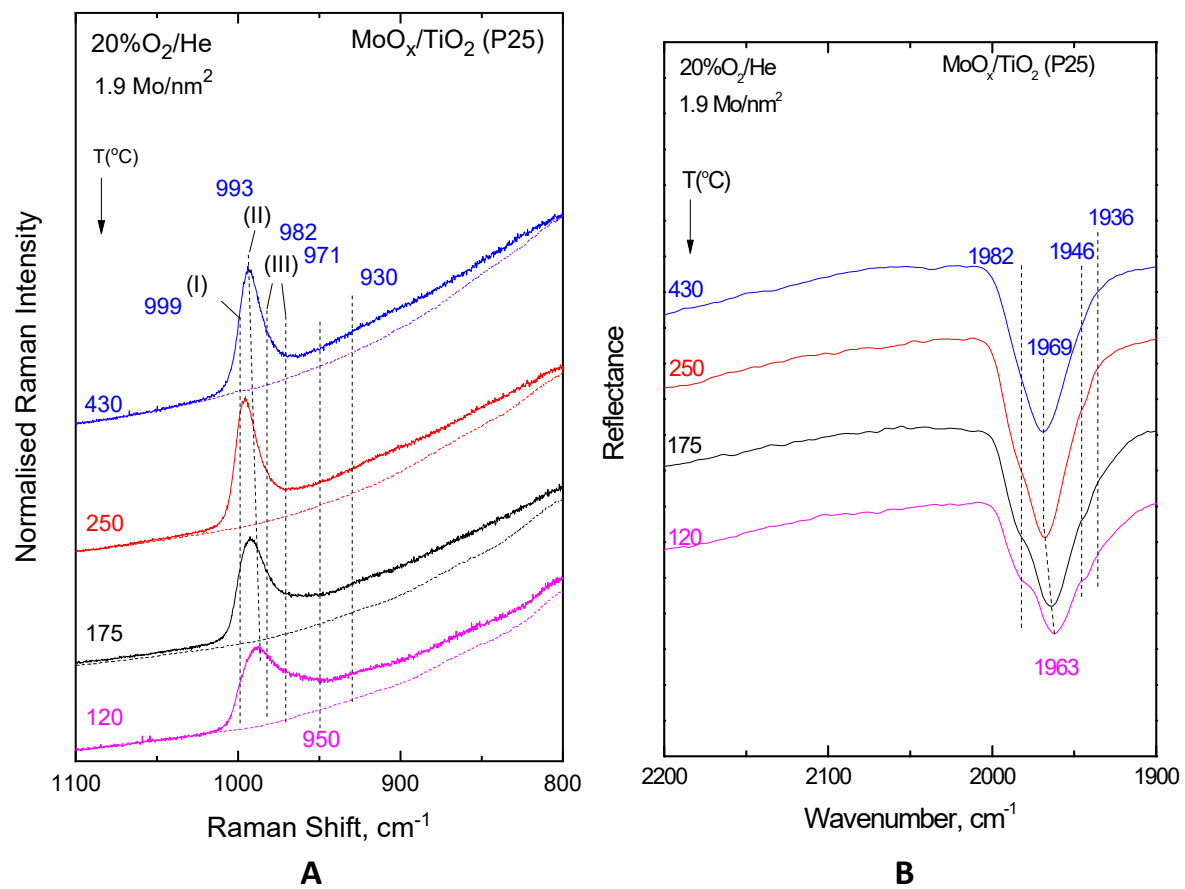

**Figure S5.**  $\text{MoO}_x/\text{TiO}_2$ (P25) with surface density of  $1.9 \text{ Mo/nm}^2$ . (A) See caption to Fig. 2(A). (B) See caption to Figure 2(C).

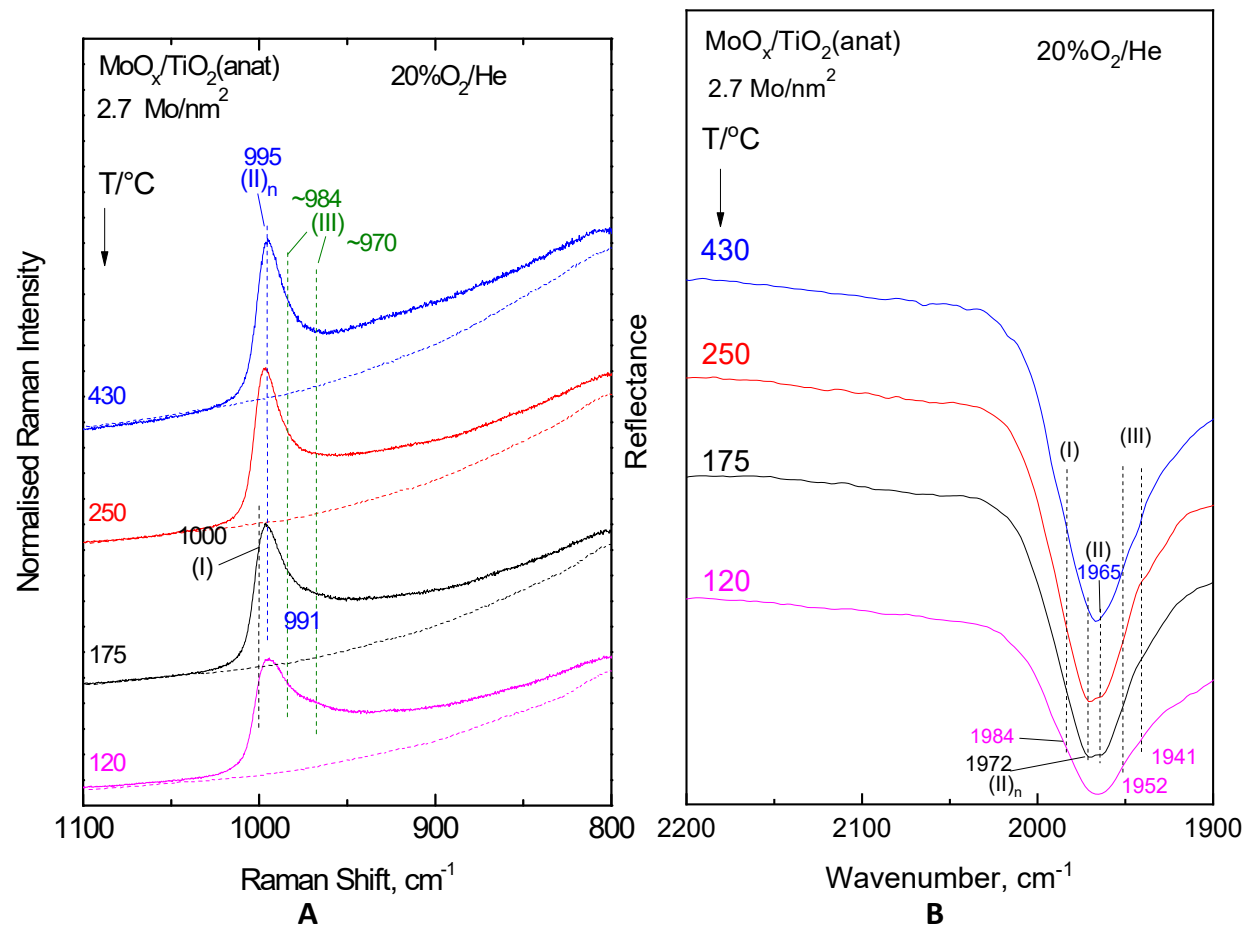

**Figure S6.**  $\text{MoO}_x/\text{TiO}_2(\text{anatase})$  with surface density of  $2.7 \text{ Mo/nm}^2$ . (A) See caption to Fig. 2(A). (B) See caption to Figure 2(C).

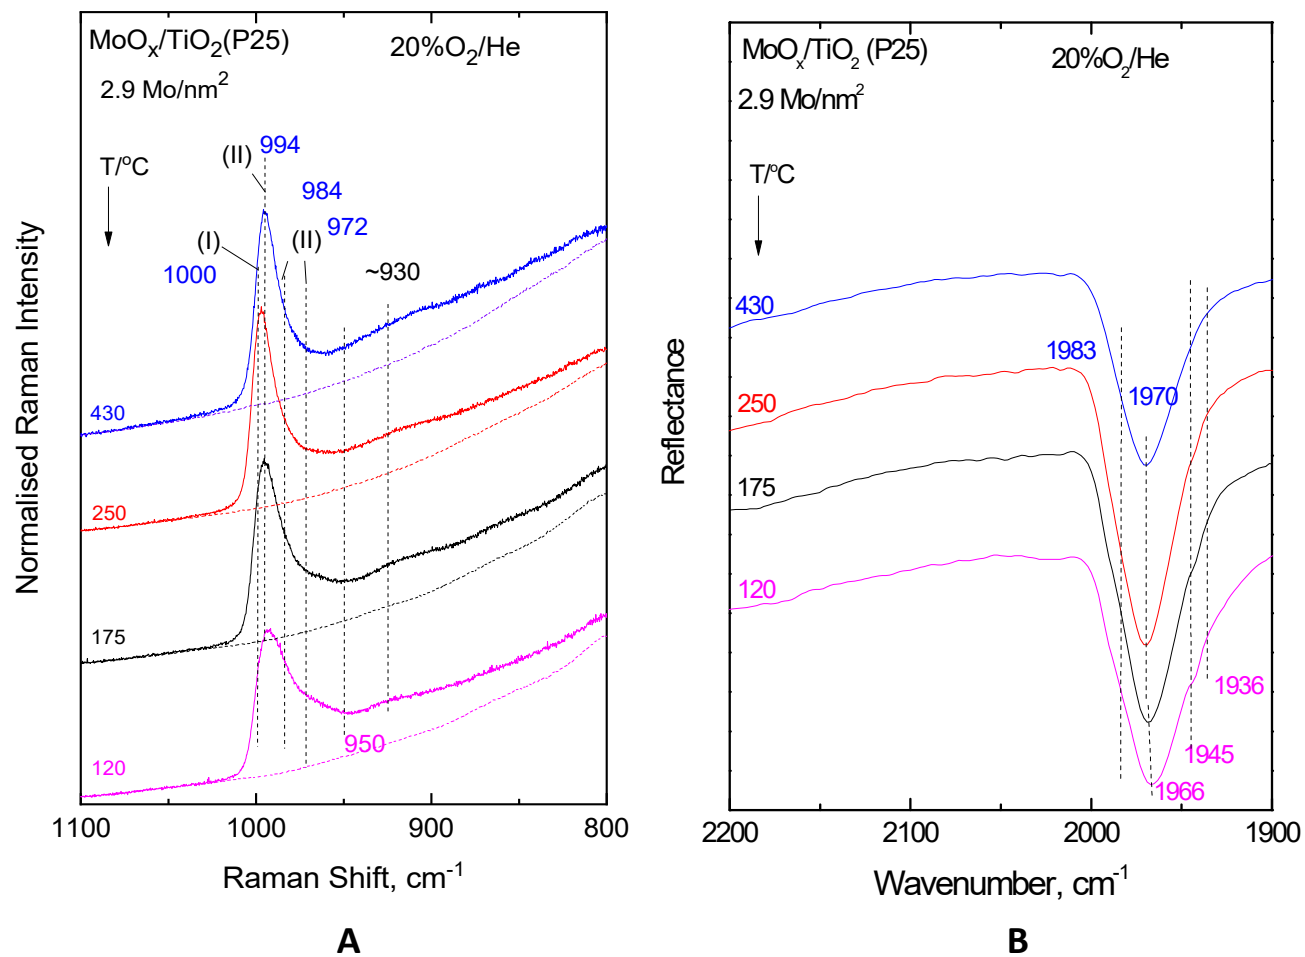

**Figure S7.**  $\text{MoO}_x/\text{TiO}_2(\text{P25})$  with surface density of  $2.9 \text{ Mo/nm}^2$ . (A) See caption to Fig. 2(A). (B) See caption to Figure 2(C).

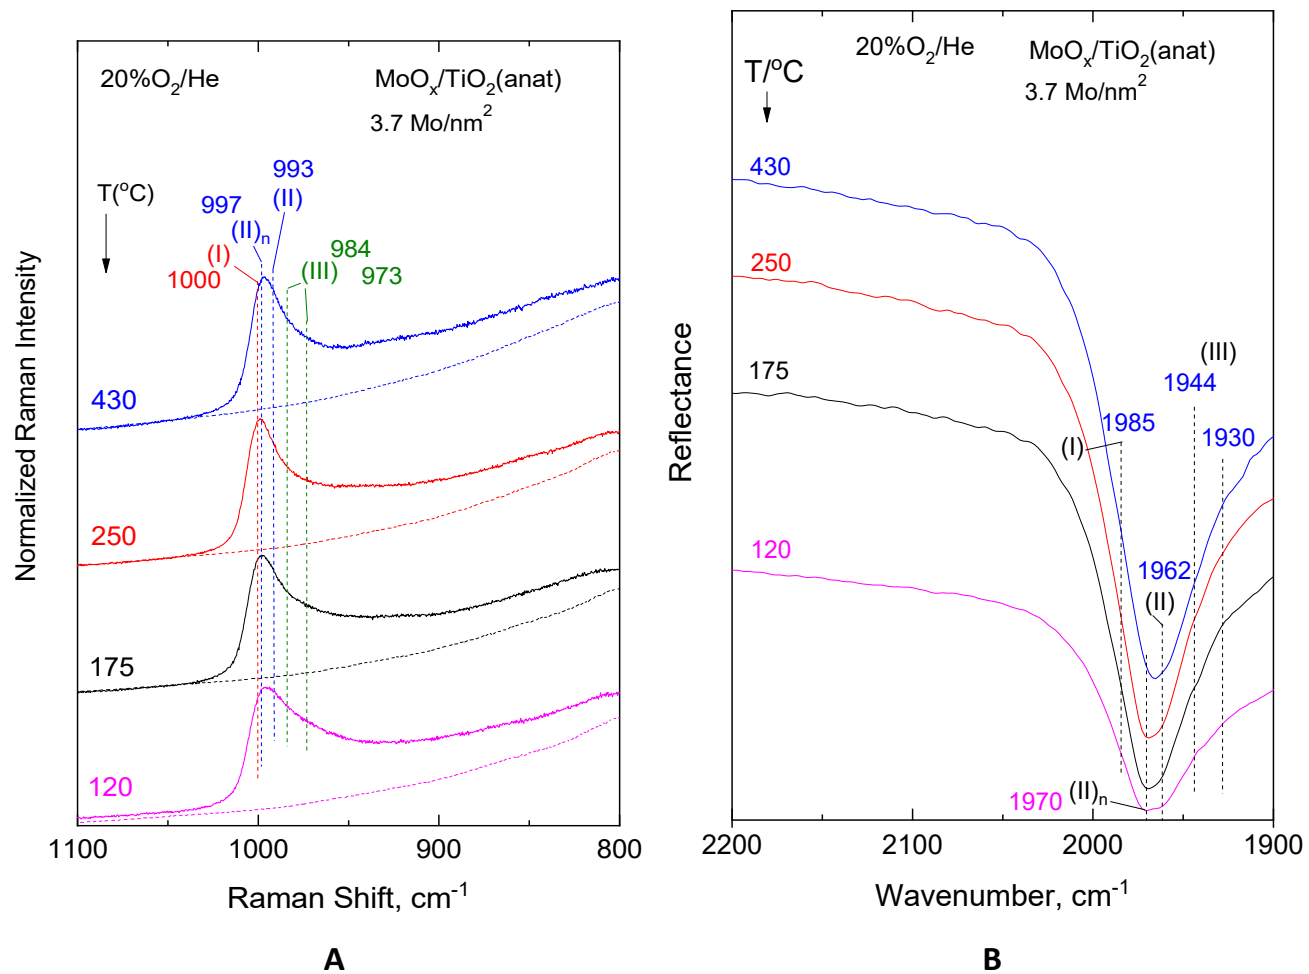

**Figure S8.** MoO<sub>x</sub>/TiO<sub>2</sub>(anatase) with surface density of 3.7 Mo/nm<sup>2</sup>. (A) See caption to Fig. 2(A). (B) See caption to Figure 2(C).

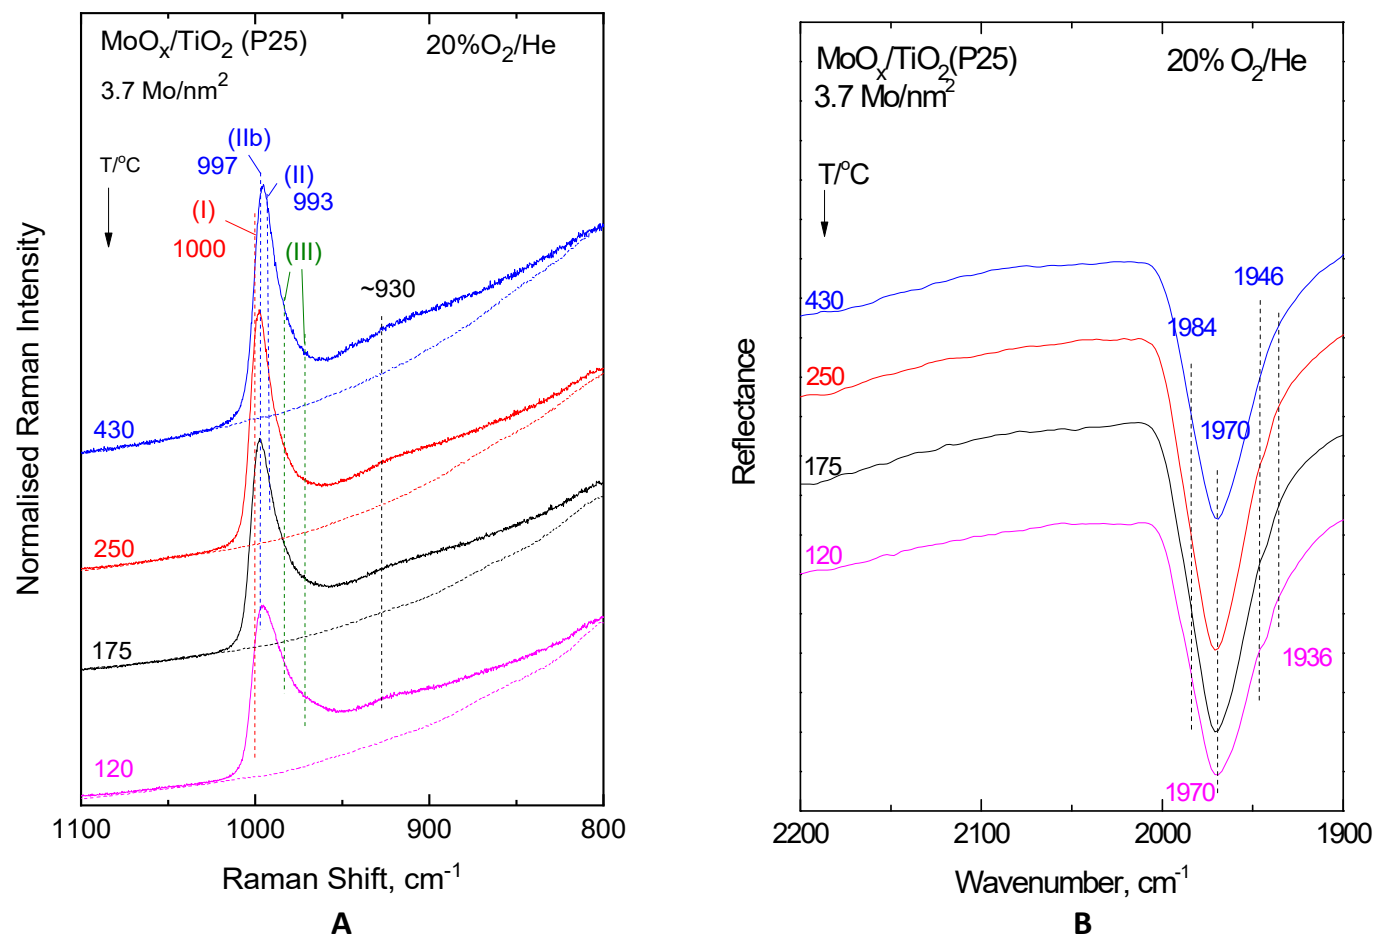

**Figure S9.** MoO<sub>x</sub>/TiO<sub>2</sub>(P25) with surface density of 3.7 Mo/nm<sup>2</sup>. (A) See caption to Fig. 2(A). (B) See caption to Figure 2(C).

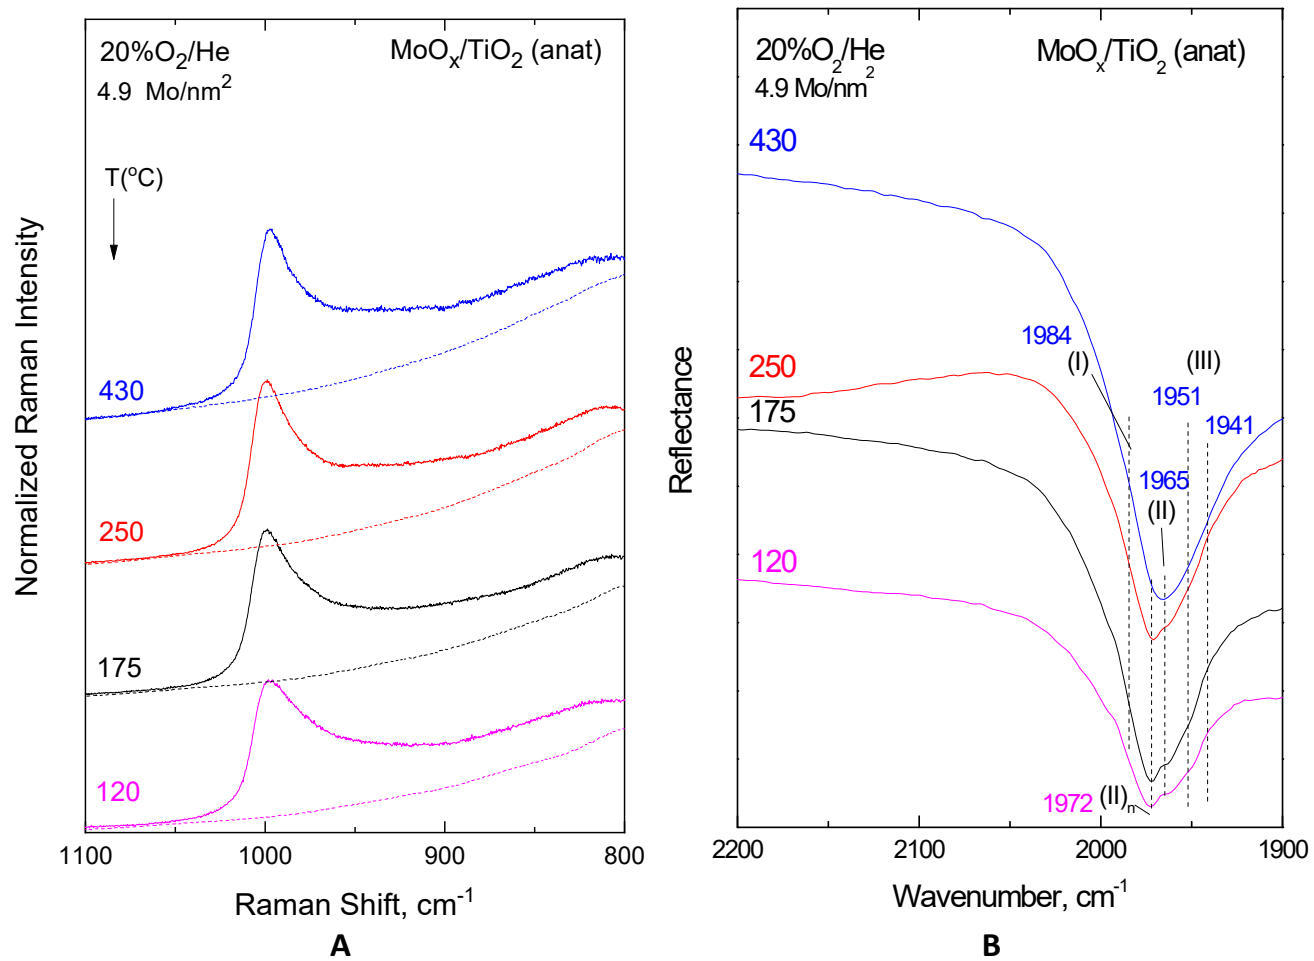

**Figure S10.**  $\text{MoO}_x/\text{TiO}_2$ (anatase) with surface density of  $4.9 \text{ Mo/nm}^2$ . (A) See caption to Fig. 2(A). (B) See caption to Figure 2(C).

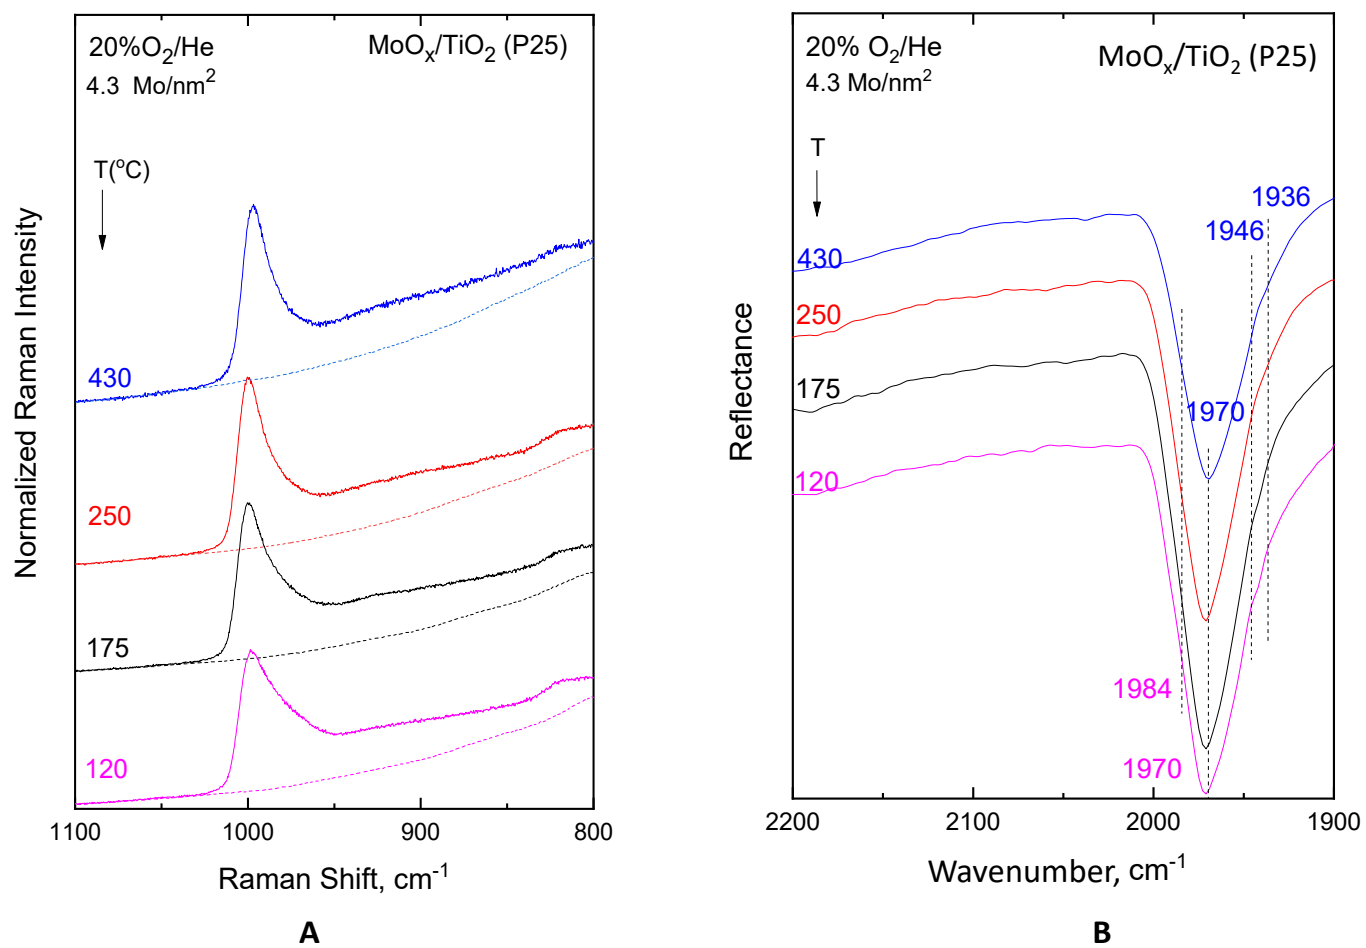

**Figure S11.** MoO<sub>x</sub>/TiO<sub>2</sub>(P25) with surface density of 4.3 Mo/nm<sup>2</sup>. (A) See caption to Fig. 2(A). (B) See caption to Figure 2(C).
